# Supplementary material for: Mesoporous scaffolds based on TiO2 nanorods and nanoparticles for efficient hybrid perovskite solar cells
Source: Royal Society of Chemistry journal article supplement (doi:10.1039/c5ta06727h), 2015-01-01
Supplement: c5ta06727h1.pdf [file c5ta06727h1.pdf]

## Supplementary Information

### Mesoporous Scaffolds Based on TiO<sub>2</sub> Nanorods and Nanoparticles for Efficient Hybrid

### Perovskite Solar Cells

Nazifah Islam<sup>1</sup>, Mengjin Yang<sup>2</sup>, Kai Zhu<sup>2\*</sup>, and Zhaoyang Fan<sup>1\*</sup>

<sup>1</sup> Department of Electrical and Computer Engineering and Nano Tech Center, Texas Tech University, Lubbock, Texas, 79409, USA

<sup>2</sup> Chemistry and Nanoscience Center, National Renewable Energy Laboratory, Golden, Colorado 80401, USA

\* Contact email: [kai.zhu@nrel.gov](mailto:kai.zhu@nrel.gov); [zhaoyang.fan@ttu.edu](mailto:zhaoyang.fan@ttu.edu)

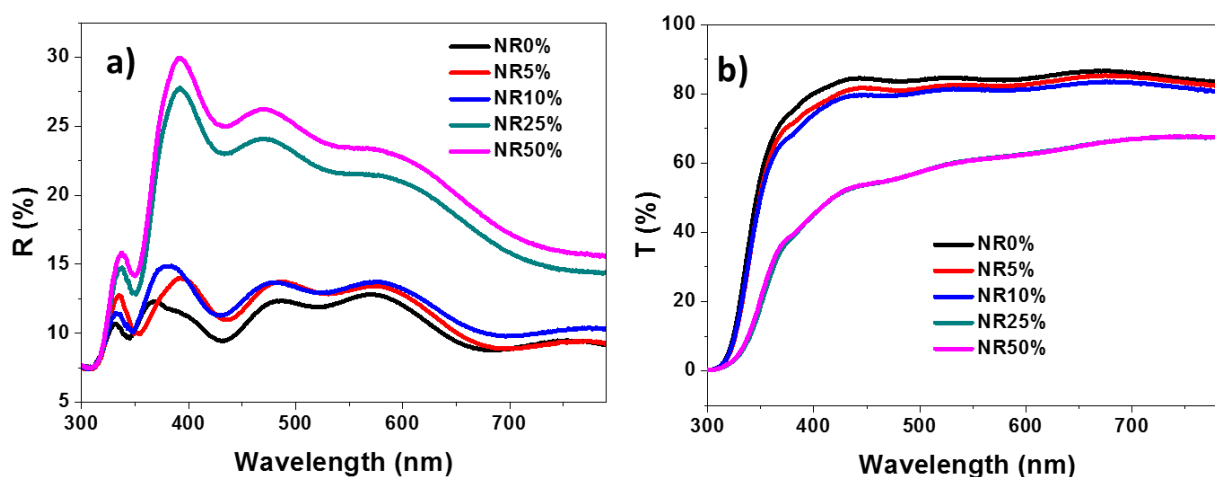

**Figure S1.** The reflection (a) and transmission (b) spectra of the five mesoporous structure (without infiltrated perovskite) in the interested wavelength range of 300 – 800 nm. As expected, as NR concentration is increased in the scaffold, the reflection is enhanced, and this is particularly true for the 25% and 50% structures. Therefore, these latter two have a significantly reduced transmission in the broad interested wavelength range of 400 – 800 nm. The 0% NR, 5% NR and 10% NR structures have similar transmission of around 80% in the wavelength range of 400-800 nm, but the scattering effect by incorporating a small amount of NRs is still discernible.

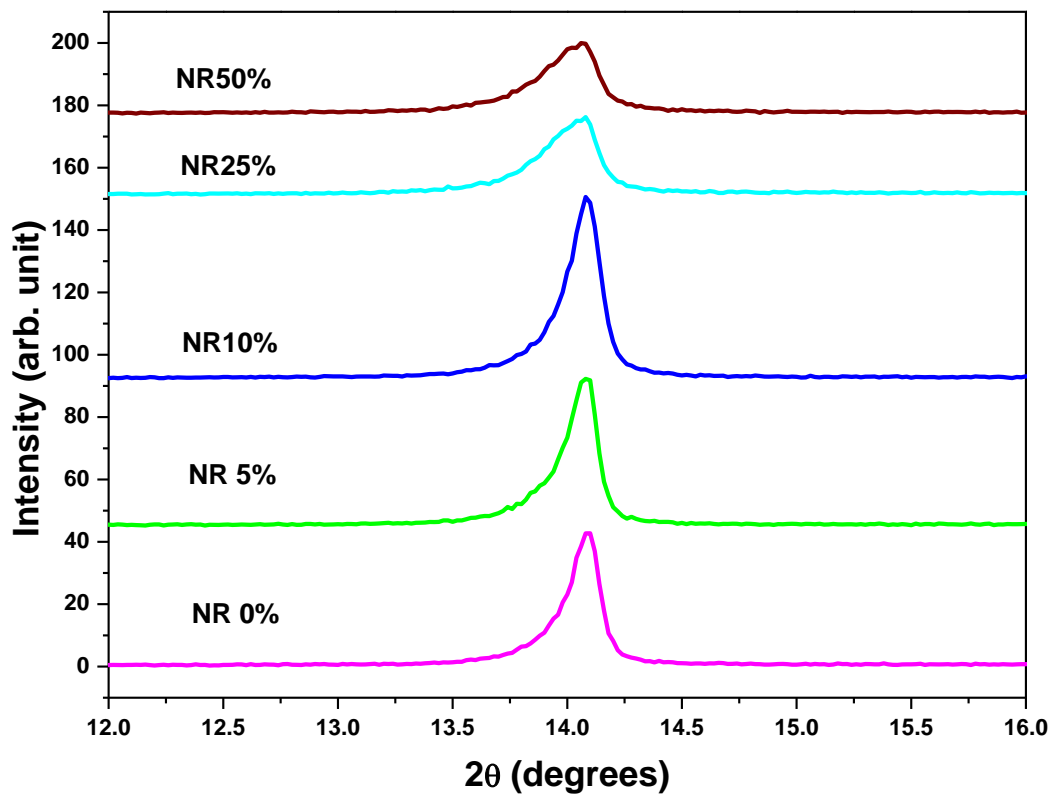

**Figure S2.** XRD (110) peak comparison of perovskite  $\text{CH}_3\text{NH}_3\text{PbI}_3$  coated on five different scaffold layers. For these five samples, their relative (110) peak values are: 1, 1.12, 1.38, 0.57, 0.52. There is noticeable peak shape change for NR25% and NR50% samples, suggesting degradation of perovskite crystalline quality.
